# Supplementary material for: Lessons from single-cell RNA sequencing of human islets
Source: PubMed Central journal article supplement (PMC9283180; doi:10.1007/s00125-022-05699-1), 2022-04-28
Supplement: 125_2022_5699_MOESM1_ESM.pdf [file 125_2022_5699_MOESM1_ESM.pdf]

ESM figure1. Differentially expressed genes in distinct islet cell types across datasets.

Beta cells

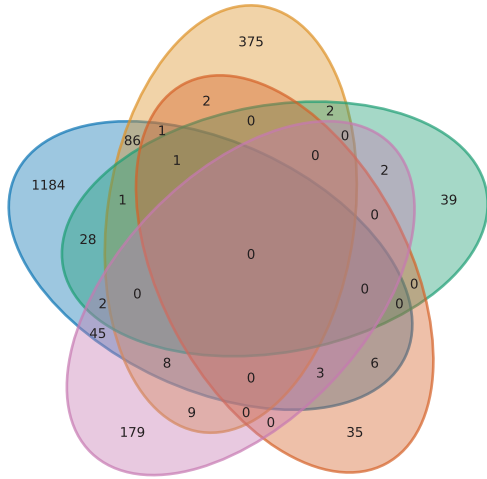

Alpha cells

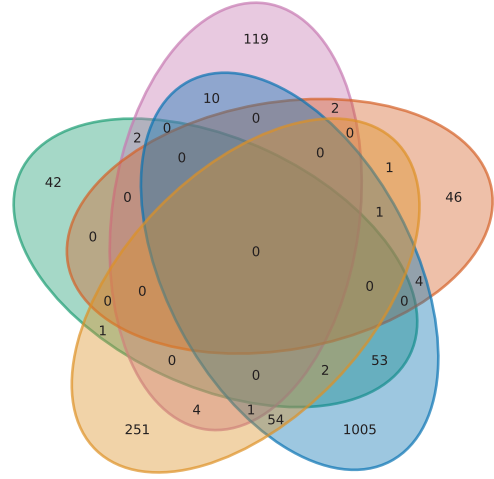

- Fang et al. [19]
- In-house data set
- Segerstolpe et al. [17]
- Xin et al. [18]
- Lawlor et al. [16]
